# Supplementary material
Source: Elsevier journal article supplement (https://www.sciencedirect.com/science/article/pii/S2341192918301215)
Supplement: mmc1 [file S2341192918301215:mmc1.pdf]

**Material suplementario 1.** Rendimiento de los modelos de regresión logística multivariada examinados.

| <b>Modelos</b>  | <b>Variables en el modelo inicial</b>                                                                          | <b>Variables en el modelo final</b>                                                            | <b>Área bajo la curva COR (95% IC; p)</b> | <b><math>\chi^2</math> - Hosmer-Lemeshow; p*</b> | <b>CIB</b> |
|-----------------|----------------------------------------------------------------------------------------------------------------|------------------------------------------------------------------------------------------------|-------------------------------------------|--------------------------------------------------|------------|
| <b>Modelo 1</b> | APCHE II, VM, procedencia, EAQ, tumor primario, etapa clínica del cáncer                                       | APCHE II, VM, EAQ, etapa clínica del cáncer                                                    | 0,88<br>(0,83-0,93;<br><0,0001)           | 12,96; 0,113                                     | 341,5      |
| <b>Modelo 2</b> | APCHE II, VM, EAQ, tumor primario, tipo de admisión, etapa clínica del cáncer                                  | APCHE II, VM, tipo de admisión                                                                 | 0,90<br>(0,85-0,94;<br><0,0001)           | 9,68; 0,288                                      | 323,6      |
| <b>Modelo 3</b> | APCHE II, VM, tumor primario, etapa clínica del cáncer, sepsis, tipo de admisión                               | APCHE II, VM, tipo de admisión                                                                 | 0,90<br>(0,85-0,94;<br><0,0001)           | 9,68; 0,288                                      | 324,2      |
| <b>Modelo 4</b> | APCHE II, VM, tumor primario, etapa clínica del cáncer, sepsis, procedencia                                    | APCHE II, VM, etapa clínica del cáncer                                                         | 0,88<br>(0,83-0,92;<br><0,0001)           | 12,91; 0,115                                     | 343,5      |
| <b>Modelo 5</b> | APCHE II, VM, tumor primario, etapa clínica del cáncer, tipo de admisión, admisión no relacionada con el tumor | APCHE II, VM, etapa clínica del cáncer, tipo de admisión, admisión no relacionada con el tumor | 0,91<br>(0,88-0,95;<br><0,0001)           | 11,06; 0,198                                     | 323,2      |
| <b>Modelo 6</b> | APCHE II, VM, tumor primario, etapa clínica del cáncer, admisión no relacionada con el tumor, procedencia      | APCHE II, VM, etapa clínica del cáncer, admisión no relacionada con el tumor                   | 0,91<br>(0,87-0,94;<br><0,0001)           | 9,97; 0,267                                      | 325,2      |
| <b>Modelo 7</b> | APCHE II, MV, tumor primario, etapa clínica del cáncer, EAQ, admisión no relacionada con el tumor              | APCHE II, VM, etapa clínica del cáncer, admisión no relacionada con el tumor                   | 0,91<br>(0,87-0,94;<br><0,0001)           | 9,97; 0,267                                      | 322,3      |
| <b>Modelo 8</b> | APCHE II, VM, tumor primario, etapa clínica del cáncer, admisión no relacionada con el tumor, sepsis           | APCHE II, VM, etapa clínica del cáncer, admisión no relacionada con el tumor                   | 0,91<br>(0,87-0,94;<br><0,0001)           | 9,97; 0,267                                      | 323,6      |
| <b>Modelo 9</b> | APCHE II, VM, etapa clínica del cáncer, EAQ, procedencia, admisión no relacionada con el tumor                 | APCHE II, VM, etapa clínica del cáncer, admisión no relacionada con el tumor                   | 0,91<br>(0,87-0,94;<br><0,0001)           | 9,97; 0,267                                      | 267,0      |

APACHE, Acute Physiology and Chronic Health Evaluation; CIB, criterio de información Bayesiano; IC, intervalo de confianza; EAQ, evento adverso a la quimioterapia; COR, características operativas del receptor; VM, ventilación mecánica.

\* Prueba de Hosmer – Lemeshow para el modelo final.
